# Supplementary material for: Identification and Genome Characterization of Novel Feline Parvovirus Strains Isolated in Shanghai, China
Source: Curr Issues Mol Biol. 2023 Apr 20;45(4):3628–39. doi: 10.3390/cimb45040236 (PMC10136790; doi:10.3390/cimb45040236)
Supplement: Supplementary file 1 [file cimb-45-00236-s001.zip]

Archive with 4 entries (4 files):
- Supplemental Figures.pdf
- Supplemental Table S1. The results of recombination event detection of VP2 gene.xlsx
- Supplemental Table S2.The results of recombination event detection of NS1 gene.xlsx
- SupplementaL Table S3. FPV sequence information used in this study.xlsx
