# Supplementary material for: Identification and Genome Characterization of Novel Feline Parvovirus Strains Isolated in Shanghai, China
Source: Curr Issues Mol Biol. 2023 Apr 20;45(4):3628–39. doi: 10.3390/cimb45040236 (PMC10136790; doi:10.3390/cimb45040236)
Supplement: Supplementary file 1 [file cimb-45-00236-s001.zip › Supplemental Table S1. The results of recombination event detection of VP2 gene.xlsx]

## Sheet: VP2 recombination
			Breakpoint Positions
		In Alignment		In Recombinant Sequence		Relative to MW650831/FPV-SH2001/Shanghai/China 2020							Detection Methods
Recombination Event Number	Number In .RDP File	Begin	End	Begin	End	Begin	End	Recombinant Sequence(s)	Minor Parental Sequence(s)	Major Parental Sequence(s)	RDP	GENECONV	Bootscan	Maxchi	Chimaera	SiSscan	PhylPro	LARD	3Seq
1	1~	138	578	138	578	138	578	MN400980/Rara/South Korea 2017	Unknown (KX434462/FPV_IZSSI_42807_15/Italy 2015)	MN683826/Fe-P2/2017/South Korea 2017	NS	NS	NS	1.68e-05	NS	0.0106	NS	NS	0.000784
1									Unknown(MW650831/FPV-SH2001/Shanghai/China 2020)	MN400978/Gigucheon/South Korea 2017
1									Unknown(MW659466/FPV-SH2002/Shanghai/China 2020)
1									Unknown(EU659112/FPV-4.us_64/USA 1964)
1									Unknown(MN451652/BFPV/Finland 1983)
1									Unknown(KX900570/HH-1/86/Shanghai/China 1986)
1									Unknown(EU659113/FPV-8a.us_89/USA 1989)
1									Unknown(X55115/193/70/Australia 1990)
1									Unknown(EU659115/FPV-Kai.us.06/USA 2006)
1									Unknown(MF069446/FPV/Raccoon/RC9/BC_2010/Canada 2010)
1									Unknown(MN451692/RACFPV1/USA 2011)
1									Unknown(MK413725/FPLV_4311/14/Italy 2014)
1									Unknown(KP280068/HRB-CS1/China 2014)
1									Unknown(MH165481/FPV-BJ04/Beijing/China 2015)
1									Unknown(KX434461/FPV_IZSSI_3201_1_15/Italy 2015)
1									Unknown(MN862744/FPV/American pine marten/MAVI-36/BC/Canad)
1									Unknown(MG924893/GX01/ Guangxi/China 2016)
1									Unknown(KX685354/HN-ZZ1/China 2016)
1									Unknown(MN862745/FPV/American pine marten/MAHG-3/BC/Canada)
1									Unknown(MN862743/FPV/American mink/MIVI-34/BC/Canada 2018)
1									Unknown(MN127779/18R217C/TH/2018/Thailand 2018)
1									Unknown(MT614366/HF1/China 2019)
1									Unknown(MN862748/FPV/River otter/OTVI-16/BC/Canada 2019)
1									Unknown(MW926316/Cat 3/United Kingdom 2019)
1									Unknown(MZ357119/rpfe013par01-5/ Sichuan/China 2020)
1									Unknown(MZ712026/AMPV2020/ Sichuan /China 2020)
2	2~	1689	224	1689	224	1689	224	^MH559110/TN/FPV/2018/India 2018	Unknown (MN451692/RACFPV1/USA 2011)	MN908257/MHS2019/China 2019	NS	NS	NS	0.000129	NS	NS	NS	NS	0.0189
2										KP280068/HRB-CS1/China 2014
2										MH165481/FPV-BJ04/Beijing/China 2015
2										KX434462/FPV_IZSSI_42807_15/Italy 2015
2										MN862744/FPV/American pine marten/MAVI-36/BC/Canad
2										KX685354/HN-ZZ1/China 2016
2										MW926316/Cat 3/United Kingdom 2019
Table Key:
~ = It is possible that this apparent recombination signal could have been caused by an evolutionary
process other than recombination.
* = The actual breakpoint position is undetermined (it was most likely overprinted by a subsequent
recombination event).
^ = The recombinant sequence may have been misidentified (one of the identified parents might be the recombinant)
Minor Parent = Parent contributing the smaller fraction of sequence.
Major Parent = Parent contributing the larger fraction of sequence.
Unknown = Only one parent and a recombinant need be in the alignment for a recombination event to be detectable.
The sequence listed as unknown was used to infer the existance of a missing parental sequence.
NS = No significant P-value was recorded for this recombination event using this method.
