# Supplementary material for: Identification and Genome Characterization of Novel Feline Parvovirus Strains Isolated in Shanghai, China
Source: Curr Issues Mol Biol. 2023 Apr 20;45(4):3628–39. doi: 10.3390/cimb45040236 (PMC10136790; doi:10.3390/cimb45040236)
Supplement: Supplementary file 1 [file cimb-45-00236-s001.zip › Supplemental Table S2.The results of recombination event detection of NS1 gene.xlsx]

## Sheet: NS1 recombination
			Breakpoint Positions
		In Alignment		In Recombinant Sequence		Relative to MW650831/FPV-SH2001/2020 Shanghai/China							Detection Methods
Recombination Event Number	Number In .RDP File	Begin	End	Begin	End	Begin	End	Recombinant Sequence(s)	Minor Parental Sequence(s)	Major Parental Sequence(s)	RDP	GENECONV	Bootscan	Maxchi	Chimaera	SiSscan	PhylPro	LARD	3Seq
0	0	0	0	0	0	0	0	0	0	0	NS	NS	NS	NS	NS	NS	NS	NS	NS
Table Key:
~ = It is possible that this apparent recombination signal could have been caused by an evolutionary
process other than recombination.
* = The actual breakpoint position is undetermined (it was most likely overprinted by a subsequent
recombination event).
^ = The recombinant sequence may have been misidentified (one of the identified parents might be the recombinant)
Minor Parent = Parent contributing the smaller fraction of sequence.
Major Parent = Parent contributing the larger fraction of sequence.
Unknown = Only one parent and a recombinant need be in the alignment for a recombination event to be detectable.
The sequence listed as unknown was used to infer the existance of a missing parental sequence.
NS = No significant P-value was recorded for this recombination event using this method.
