# Supplementary material for: Identification and Genome Characterization of Novel Feline Parvovirus Strains Isolated in Shanghai, China
Source: Curr Issues Mol Biol. 2023 Apr 20;45(4):3628–39. doi: 10.3390/cimb45040236 (PMC10136790; doi:10.3390/cimb45040236)
Supplement: Supplementary file 1 [file cimb-45-00236-s001.zip › SupplementaL Table S3. FPV sequence information used in this study.xlsx]

## Sheet: 32 FCV NS1 information
Accession No	Strain	Gene	length	Host	Country/region	Year	Variants
MW650831	FPV-SH2001	NS1	2007bp	domestic cat	China/Shanghai	2020	FPV
MW659466	FPV-SH2002	NS1	2007bp	domestic cat	China/Shanghai	2020	FPV
EU659112	FPV-4.us_64	NS1	2007bp	domestic cat	USA	1964	FPV
MN451652	BFPV	NS1	2007bp	Vulpes lagopus	Finland	1983	FPV
KX900570	HH-1/86	NS1	2007bp	jaguar	China: Shanghai Zoo	1986	FPV
EU659113	FPV-8a.us_89	NS1	2007bp	mountain lion	USA	1989	FPV
X55115	193/70	NS1	2007bp	domestic cat	Australia	1990	FPV
MG764510	FPV-G	NS1	2007bp	Panthera tigris	China/Guilin	1999	FPV
EU659115	FPV-Kai.us.06	NS1	2007bp	domestic cat	USA	2006	FPV
MF069446	FPV/Raccoon/RC9/BC_2010	NS1	2007bp	Procyon lotor	Canada: British Columbia	2010	FPV
MN451692	RACFPV1	NS1	2007bp	Procyon lotor	USA	2011	FPV
MK413725	FPLV_4311/14	NS1	2007bp	cat	Italy	2014	FPV
KP280068	HRB-CS1	NS1	2007bp	cat	China	2014	FPV
MH165481	FPV-BJ04	NS1	2007bp	domestic cat	China/Beijing	2015	FPV
KX434461	FPV_IZSSI_3201_1_15	NS1	2007bp	domestic cat	Italy	2015	FPV
KX434462	FPV_IZSSI_42807_15	NS1	2007bp	cat	Italy	2015	FPV
MN862744	FPV/American pine marten/MAVI-36/BC_2016	NS1	2007bp	Martes americana	Canada	2016	FPV
MG924893	GX01	NS1	2007bp	feline	China/ Guangxi	2016	FPV
KX685354	HN-ZZ1	NS1	2007bp	tiger	China	2016	FPV
MN862745	FPV/American pine marten/MAHG-3/BC_2017	NS1	2007bp	Martes americana	Canada	2017	FPV
MN683826	Fe-P2/2017	NS1	2007bp	wild cat	South Korea	2017	FPV
MN400978	Gigucheon	NS1	2007bp	feline	South Korea	2017	FPV
MN400980	Rara	NS1	2007bp	feline	South Korea	2017	FPV
MN862743	FPV/American mink/MIVI-34/BC_2018	NS1	2007bp	Neovison vison	Canada: British Columbia, Vancouver Island	2018	FPV
MN127779	18R217C/TH/2018	NS1	2007bp	Felis catus	Thailand	2018	FPV
MH559110	TN/FPV/2018	NS1	2007bp	Felis catus	India	2018	FPV
MT614366	HF1	NS1	2007bp	cat	China	2019	FPV
MN908257	MHS2019	NS1	2007bp	South China tiger	China: Meihuashan National Reserve	2019	FPV
MN862748	FPV/River otter/OTVI-16/BC_2019	NS1	2007bp	Lontra canadensis	Canada	2019	FPV
MW926316	Cat 3	NS1	2007bp	cat	United Kingdom	2019	FPV
MZ357119	rpfe013par01-5	NS1	2007bp	Ailurus fulgens	China/Sichuan	2020	FPV
MZ712026	AMPV2020	NS1	2007bp	giant panda	China/ Sichuan	2020	FPV

## Sheet: 32 VP2 information
Accession No	Strain	Gene	length	Host	Country/region	Year	Variants
MW650831	FPV-SH2001	VP2	1755bp	domestic cat	China/Shanghai	2020	FPV
MW659466	FPV-SH2002	VP2	1755bp	domestic cat	China/Shanghai	2020	FPV
EU659112	FPV-4.us_64	VP2	1755bp	domestic cat	USA	1964	FPV
MN451652	BFPV	VP2	1755bp	Vulpes lagopus	Finland	1983	FPV
KX900570	HH-1/86	VP2	1755bp	jaguar	China: Shanghai Zoo	1986	FPV
EU659113	FPV-8a.us_89	VP2	1755bp	mountain lion	USA	1989	FPV
X55115	193/70	VP2	1755bp	domestic cat	Australia	1990	FPV
MG764510	FPV-G	VP2	1755bp	Panthera tigris	China/Guilin	1999	FPV
EU659115	FPV-Kai.us.06	VP2	1755bp	domestic cat	USA	2006	FPV
MF069446	FPV/Raccoon/RC9/BC_2010	VP2	1755bp	Procyon lotor	Canada: British Columbia	2010	FPV
MN451692	RACFPV1	VP2	1755bp	Procyon lotor	USA	2011	FPV
MK413725	FPLV_4311/14	VP2	1755bp	cat	Italy	2014	FPV
KP280068	HRB-CS1	VP2	1755bp	cat	China	2014	FPV
MH165481	FPV-BJ04	VP2	1752bp	domestic cat	China/Beijing	2015	FPV
KX434461	FPV_IZSSI_3201_1_15	VP2	1755bp	domestic cat	Italy	2015	FPV
KX434462	FPV_IZSSI_42807_15	VP2	1755bp	cat	Italy	2015	FPV
MN862744	FPV/American pine marten/MAVI-36/BC_2016	VP2	1755bp	Martes americana	Canada	2016	FPV
MG924893	GX01	VP2	1755bp	feline	China/ Guangxi	2016	FPV
KX685354	HN-ZZ1	VP2	1755bp	tiger	China	2016	FPV
MN862745	FPV/American pine marten/MAHG-3/BC_2017	VP2	1755bp	Martes americana	Canada	2017	FPV
MN683826	Fe-P2/2017	VP2	1755bp	wild cat	South Korea	2017	FPV
MN400978	Gigucheon	VP2	1755bp	feline	South Korea	2017	FPV
MN400980	Rara	VP2	1755bp	feline	South Korea	2017	FPV
MN862743	FPV/American mink/MIVI-34/BC_2018	VP2	1755bp	Neovison vison	Canada: British Columbia, Vancouver Island	2018	FPV
MN127779	18R217C/TH/2018	VP2	1755bp	Felis catus	Thailand	2018	FPV
MH559110	TN/FPV/2018	VP2	1755bp	Felis catus	India	2018	FPV
MT614366	HF1	VP2	1755bp	cat	China	2019	FPV
MN908257	MHS2019	VP2	1755bp	South China tiger	China: Meihuashan National Reserve	2019	FPV
MN862748	FPV/River otter/OTVI-16/BC_2019	VP2	1752bp	Lontra canadensis	Canada	2019	FPV
MW926316	Cat 3	VP2	1755bp	cat	United Kingdom	2019	FPV
MZ357119	rpfe013par01-5	VP2	1755bp	Ailurus fulgens	China/Sichuan	2020	FPV
MZ712026	AMPV2020	VP2	1755bp	giant panda	China/ Sichuan	2020	FPV

## Sheet: 32 complete genome information
Accession No	Strain	Gene	length	Host	Country/region	Year	Variants
MW650831	FPV-SH2001	complete genome	5050bp	domestic cat	China/Shanghai	2020	FPV
MW659466	FPV-SH2002	complete genome	4811bp	domestic cat	China/Shanghai	2020	FPV
EU659112	FPV-4.us_64	complete genome	4269bp	domestic cat	USA	1964	FPV
MN451652	BFPV	complete genome	4269bp	Vulpes lagopus	Finland	1983	FPV
KX900570	HH-1/86	complete genome	5123bp	jaguar	China: Shanghai Zoo	1986	FPV
EU659113	FPV-8a.us_89	complete genome	4269bp	mountain lion	USA	1989	FPV
X55115	193/70	complete genome	4983bp	domestic cat	Australia	1990	FPV
MG764510	FPV-G	complete genome	4778bp	Panthera tigris	China/Guilin	1999	FPV
EU659115	FPV-Kai.us.06	complete genome	4269bp	domestic cat	USA	2006	FPV
MF069446	FPV/Raccoon/RC9/BC_2010	complete genome	4524bp	Procyon lotor	Canada: British Columbia	2010	FPV
MN451692	RACFPV1	complete genome	4269bp	Procyon lotor	USA	2011	FPV
MK413725	FPLV_4311/14	complete genome	4269bp	cat	Italy	2014	FPV
KP280068	HRB-CS1	complete genome	4688bp	cat	China	2014	FPV
MH165481	FPV-BJ04	complete genome	5118bp	domestic cat	China/Beijing	2015	FPV
KX434461	FPV_IZSSI_3201_1_15	complete genome	4837bp	domestic cat	Italy	2015	FPV
KX434462	FPV_IZSSI_42807_15	complete genome	4941bp	cat	Italy	2015	FPV
MN862744	FPV/American pine marten/MAVI-36/BC_2016	complete genome	4462bp	Martes americana	Canada	2016	FPV
MG924893	GX01	complete genome	4901bp	feline	China/ Guangxi	2016	FPV
KX685354	HN-ZZ1	complete genome	4688bp	tiger	China	2016	FPV
MN862745	FPV/American pine marten/MAHG-3/BC_2017	complete genome	4495bp	Martes americana	Canada	2017	FPV
MN683826	Fe-P2/2017	complete genome	4643bp	wild cat	South Korea	2017	FPV
MN400978	Gigucheon	complete genome	4837bp	feline	South Korea	2017	FPV
MN400980	Rara	complete genome	4837bp	feline	South Korea	2017	FPV
MN862743	FPV/American mink/MIVI-34/BC_2018	complete genome	4458bp	Neovison vison	Canada: British Columbia, Vancouver Island	2018	FPV
MN127779	18R217C/TH/2018	complete genome	4381bp	Felis catus	Thailand	2018	FPV
MH559110	TN/FPV/2018	complete genome	4837bp	Felis catus	India	2018	FPV
MT614366	HF1	complete genome	5125bp	cat	China	2019	FPV
MN908257	MHS2019	complete genome	4672bp	South China tiger	China: Meihuashan National Reserve	2019	FPV
MN862748	FPV/River otter/OTVI-16/BC_2019	complete genome	4522bp	Lontra canadensis	Canada	2019	FPV
MW926316	Cat 3	complete genome	4963bp	cat	United Kingdom	2019	FPV
MZ357119	rpfe013par01-5	complete genome	5078bp	Ailurus fulgens	China/Sichuan	2020	FPV
MZ712026	AMPV2020	complete genome	5277 bp	giant panda	China/ Sichuan	2020	FPV
